# Supplementary material for: Implementation Science in Suicide Prevention
Source: Atypon-hosted journal article supplement (doi:10.1027/0227-5910/a000846), 2022-01-01
Supplement: 0227-5910_a000846_esm1.pdf [file 0227-5910_a000846_esm1.pdf]

**Electronic Supplementary Material 1**

Table E1: Examples of multi-level interventions (implementation strategies and research approaches)

|                                           | <b>OSPI</b>                                                                                                                                                                                                                                                                                        | <b>SPIRIT</b>                                                                                                                                                                                                                                              | <b>Qungasvik</b>                                                                                                                                                                                                                                                                                                                                                                                                                                                                             | <b>Commonalities</b>                                                                                                                                                                                                                                                                           |
|-------------------------------------------|----------------------------------------------------------------------------------------------------------------------------------------------------------------------------------------------------------------------------------------------------------------------------------------------------|------------------------------------------------------------------------------------------------------------------------------------------------------------------------------------------------------------------------------------------------------------|----------------------------------------------------------------------------------------------------------------------------------------------------------------------------------------------------------------------------------------------------------------------------------------------------------------------------------------------------------------------------------------------------------------------------------------------------------------------------------------------|------------------------------------------------------------------------------------------------------------------------------------------------------------------------------------------------------------------------------------------------------------------------------------------------|
| Location                                  | Ireland, Portugal, Hungary, Germany                                                                                                                                                                                                                                                                | Gujarat, India                                                                                                                                                                                                                                             | Alaska, United States of America                                                                                                                                                                                                                                                                                                                                                                                                                                                             | <ul style="list-style-type: none"> <li>• Community-based</li> <li>• Intersectoral collaborations</li> <li>• Engagement of multiple key actors and stakeholders</li> <li>• Adaptation of interventions to local context/community settings</li> <li>• Synergies within interventions</li> </ul> |
| Target group(s)                           | All age groups, different sub-populations                                                                                                                                                                                                                                                          | All age groups, different sub-populations                                                                                                                                                                                                                  | All age groups with a specific focus on the youth                                                                                                                                                                                                                                                                                                                                                                                                                                            |                                                                                                                                                                                                                                                                                                |
| Number of levels/components               | 4                                                                                                                                                                                                                                                                                                  | 3                                                                                                                                                                                                                                                          | 36 intervention modules aimed at community, family, and individual levels                                                                                                                                                                                                                                                                                                                                                                                                                    |                                                                                                                                                                                                                                                                                                |
| Interventions/levels                      | <ul style="list-style-type: none"> <li>• Training and support in general practice</li> <li>• General public awareness campaign</li> <li>• Training of gatekeepers in the community</li> <li>• Improvement in care for high-risk groups</li> <li>• Restriction of access to lethal means</li> </ul> | <ul style="list-style-type: none"> <li>• The Youth Aware of Mental Health – school-based program for adolescents</li> <li>• A community storage facility for pesticides</li> <li>• Training of community health workers in early identification</li> </ul> | <p><b>Community level:</b> For example - Using ‘Qasgiq’ (Men’s house) a sacred communal setting to hold discussions around the way of life or ‘how to live’</p> <p><b>Family level:</b> For example – Yup’ik kinship terms – constructing the family genogram to identify resource people and role models.</p> <p><b>Individual level:</b> For example – ‘Surviving your feelings’ – creating settings where youth can openly discuss their feelings about taboo topics such as suicide.</p> |                                                                                                                                                                                                                                                                                                |
| Examples of key implementation strategies | Evaluative and iterative strategies: <ul style="list-style-type: none"> <li>• Capture and share local knowledge</li> </ul>                                                                                                                                                                         | Evaluative and iterative strategies: <ul style="list-style-type: none"> <li>• Capture and share local knowledge</li> </ul>                                                                                                                                 | Evaluative and iterative strategies: <ul style="list-style-type: none"> <li>• Capture and share local knowledge</li> </ul>                                                                                                                                                                                                                                                                                                                                                                   |                                                                                                                                                                                                                                                                                                |

|                                                     |                                                                                                                                                                                                                                                                                                                                    |                                                                                                                                                                                                                                                                                                                                                                                                     |                                                                                                                                                                                                                                                                          |  |
|-----------------------------------------------------|------------------------------------------------------------------------------------------------------------------------------------------------------------------------------------------------------------------------------------------------------------------------------------------------------------------------------------|-----------------------------------------------------------------------------------------------------------------------------------------------------------------------------------------------------------------------------------------------------------------------------------------------------------------------------------------------------------------------------------------------------|--------------------------------------------------------------------------------------------------------------------------------------------------------------------------------------------------------------------------------------------------------------------------|--|
| <p>(Powell et al., 2015; Kirchner et al., 2017)</p> | <p>Develop stakeholder interrelationships:</p> <ul style="list-style-type: none"> <li>• Use advisory boards and workgroups</li> <li>• Build a coalition</li> </ul> <p>Train and educate stakeholders:</p> <ul style="list-style-type: none"> <li>• Conduct ongoing training</li> <li>• Use train-the-trainer strategies</li> </ul> | <ul style="list-style-type: none"> <li>• Conduct local needs assessment</li> <li>• Develop a formal implementation blueprint</li> </ul> <p>Adapt and tailor to context:</p> <ul style="list-style-type: none"> <li>• Promote adaptability</li> </ul> <p>Develop stakeholder interrelationships:</p> <ul style="list-style-type: none"> <li>• Mandate change</li> <li>• Build a coalition</li> </ul> | <ul style="list-style-type: none"> <li>• Conduct local consensus discussions</li> </ul> <p>Develop stakeholder interrelationships:</p> <ul style="list-style-type: none"> <li>• Create a learning collaborative</li> <li>• Use advisory boards and workgroups</li> </ul> |  |
| <p>Research Design / Approach</p>                   | <p>Prospective controlled intervention effectiveness study (including a process evaluation)</p> <p>Hybrid Design Type 1</p>                                                                                                                                                                                                        | <p>Cluster randomised intervention trial (including a process evaluation)</p> <p>Hybrid Design Type 1</p>                                                                                                                                                                                                                                                                                           | <p>Participatory research (to inform program development and implementation)</p>                                                                                                                                                                                         |  |

Kirchner, J. E., Waltz, T. J., Powell, B. J., Smith, J. L., & Proctor, E. K. (2017). Implementation strategies. In R. C. Brownson, G. A. Colditz, & E. K. Proctor (Eds.), *Dissemination and implementation research in health: Translating science to practice* (2nd ed., pp. 245–266). Oxford University Press. <https://doi.org/10.1093/oso/9780190683214.003.0015>
